# Supplementary material
Source: publisher site journal article supplement (https://www.dovepress.com/article/223354)
Supplement: Supplementary file 1 [file get_supplementary_file.php]

## Epworth Sleepiness Scale (ESS)

(Johns MW. A new method for measuring daytime sleepiness: the Epworth sleepiness scale. Sleep, 1991,14(6):540-545.)

Each situation receives a score of 0–3:

0 = would never doze

1 = slight chance of dozing

2 = moderate chance of dozing

3 = high chance of dozing

| Situation                                                | Chance of dozing or sleeping |
|----------------------------------------------------------|------------------------------|
| Sitting and reading                                      |                              |
| Watching TV                                              |                              |
| Sitting inactive in a public place                       |                              |
| Being a passenger in a motor vehicle for an hour or more |                              |
| Lying down in the afternoon                              |                              |
| Sitting and talking to someone                           |                              |
| Sitting quietly after lunch (no alcohol)                 |                              |
| Stopped for a few minutes in traffic                     |                              |
| Total score                                              |                              |

High risk of excessive daytime sleepiness ESS score  $\geq 11$

Low risk of excessive daytime sleepiness ESS score  $< 11$

## Sleep Apnea Clinical Score (SACS)

(Flemons WW, et al. Likelihood ratios for a sleep apnea clinical prediction rule. Am J Respir Crit Care Med, 1994, 150(5 Pt 1):1279-1285.)

| <b>Prediction of OSA</b>          |                             |            |             |                             |            |             |
|-----------------------------------|-----------------------------|------------|-------------|-----------------------------|------------|-------------|
| (Circle the patient's score.)     |                             |            |             |                             |            |             |
| <b>Sleep Apnea Clinical Score</b> |                             |            |             |                             |            |             |
|                                   | <b>Not Hypertensive</b>     |            |             | <b>Hypertensive</b>         |            |             |
|                                   | <b>Historical Features*</b> |            |             | <b>Historical Features*</b> |            |             |
| <b>Neck Circ (cm)</b>             | <b>None</b>                 | <b>One</b> | <b>Both</b> | <b>None</b>                 | <b>One</b> | <b>Both</b> |
| <30                               | 0                           | 0          | 1           | 0                           | 1          | 2           |
| 30/31                             | 0                           | 0          | 1           | 1                           | 2          | 4           |
| 32/33                             | 0                           | 1          | 2           | 1                           | 3          | 5           |
| 34/35                             | 1                           | 2          | 3           | 2                           | 4          | 8           |
| 36/37                             | 1                           | 3          | 5           | 4                           | 6          | 11          |
| 38/39                             | 2                           | 4          | 7           | 5                           | 9          | 16          |
| 40/41                             | 3                           | 6          | 10          | 8                           | 13         | 22          |
| 42/43                             | 5                           | 8          | 14          | 11                          | 18         | 30          |
| 44/45                             | 7                           | 12         | 20          | 15                          | 25         | 42          |
| 46/47                             | 10                          | 16         | 28          | 21                          | 35         | 58          |
| 48/49                             | 14                          | 23         | 38          | 29                          | 48         | 80          |
| >49                               | 19                          | 32         | 53          | 40                          | 66         | 110         |

\*Historical Features: 1. Habitual snoring  
2. Partner reports of gasping, choking, or snorting

Probability of Sleep Apnea

|  |                                       |
|--|---------------------------------------|
|  | Low - Sleep Apnea Clinical Score <15  |
|  | High - Sleep Apnea Clinical Score ≥15 |

TOTAL SLEEP APNEA CLINICAL SCORE: \_\_\_\_\_

## Berlin Questionnaire (BQ)

(Netzer NC, et al. Using the Berlin Questionnaire to identify patients at risk for the sleep apnea syndrome. Ann Intern Med, 1999, 131(7):485-491.)

### Category 1

Q1. Do you snore?

Yes (1)

No (0)

Do not know/refused

Q2. If you snore, your snoring is:

Slightly louder than breathing (0)

As loud as talking (0)

Louder than talking (1)

Very loud; can be heard in adjacent rooms (1)

Do not know/refused (0)

Q3. How often do you snore?

Nearly every day (1)

3 to 4 nights per week (1)

1 to 2 nights per week (0)

1 to 2 nights per month (0)

Never or nearly never/do not know (0)

Q4. Has your snoring ever bothered other people?

Yes (1)

No (0)

Do not know/refused (0)

Q5. Has anyone noticed that you quit breathing during your sleep?

Nearly every day (2)

3 to 4 times a week (2)

1 to 2 times a week (0)

1 to 2 times a month (0)

Never or nearly never/do not know/refused (0)

## Category 2

Q6. How often do you feel tired or fatigued after your sleep?

Nearly every day (1)

3 to 4 times a week (1)

1 to 2 times a week (0)

1 to 2 times a month (0)

Never or nearly never/do not know/refused (0)

Q7. During your wake time, do you feel tired, fatigued, or not up to par?

Nearly every day (1)

3 to 4 times a week (1)

1 to 2 times a week (0)

1 to 2 times a month (0)

Never or nearly never/do not know/refused (0)

Q8. Have you ever nodded off or fallen asleep while driving a vehicle?

Yes (1)

No (0)

Do not know/refused (0)

Q9. If yes, how often does it occur?

Nearly every day (1)

3 to 4 times a week (1)

1 to 2 times a week (0)

1 to 2 times a month (0)

Never or nearly never/don't know/refused (0)

## Category 3

Q10. Do you have high BP?

Yes (1)

No (0)

Do not know/refused (0)

Q11. BMI, kg/m<sup>2</sup>

>30 (1)

≤30 (0)

**Scoring**

Category 1 is positive with  $\geq 2$  positive responses to questions 1–5.

Category 2 is positive with  $\geq 2$  positive responses to questions 6–9.

Category 3 is positive with a self-report of high blood pressure and/or a BMI of  $>30$  kg/m<sup>2</sup>.

High risk of OSA Two or more categories scored as positive.

Low risk of OSA Less than two categories scored as positive.

## STOP-Bang Questionnaire (SBQ)

(STOP-Bang, an Alternative Scoring Model Combining BMI, Age, Neck Circumference, and Gender with the STOP Questionnaire). In: Chung F, et al. STOP questionnaire: a tool to screen patients for obstructive sleep apnea. *Anesthesiology*, 2008, 108(5):812-821.

### STOP-Bang Questionnaire

1. **Snoring:** Do you snore loudly (loud enough to be heard through closed doors)?  
Yes                  No
2. **Tired:** Do you often feel tired, fatigued, or sleepy during daytime?  
Yes                  No
3. **Observed:** Has anyone observed you stop breathing during your sleep?  
Yes                  No
4. **Blood Pressure:** Do you have or are you being treated for high blood pressure?  
Yes                  No
5. **BMI:** BMI more than 35 kg/m<sup>2</sup>?  
Yes                  No
6. **Age:** Age over 50 years old?  
Yes                  No
7. **Neck circumference:** Neck circumference greater than 40 cm?  
Yes                  No
8. **Gender:** Male?  
Yes                  No

---

*High risk of OSA:* Yes to 3 or more questions

*Low risk of OSA:* Yes to less than 3 questions

Chung F et al. *Anesthesiology* 2008;108:812-21.

---
